# Supplementary material for: Homeotropic orientation of an ion-channel forming mesophase induced by nanotemplate wetting
Source: Royal Society of Chemistry journal article supplement (doi:10.1039/d3cp05392j), 2024-01-01
Supplement: d3cp05392j1.pdf [file d3cp05392j1.pdf]

## Supporting Information

### Homeotropic orientation of ion-channel forming mesophase induced by nanotemplate wetting

Jaime J. Hernandez,<sup>\*a,§</sup> Denis V. Anokhin,<sup>b,c</sup> Martin Rosenthal,<sup>a,l</sup> Xiaomin Zhu<sup>d</sup> and Dimitri A. Ivanov<sup>\*a,b,c</sup>

<sup>a.</sup> Institut de Sciences des Matériaux de Mulhouse (IS2M), CNRS UMR 7361, 15, rue Jean Starcky, 15, F-68057 Mulhouse (France). E-mail: dimitri.ivanov@uha.fr

<sup>b.</sup> Faculty of Chemistry, Lomonosov Moscow State University (MSU), GSP-1, 1-3 Leninskiye Gory, 119991 (Russian Federation).

<sup>c.</sup> Scientific Center for Genetics and Life Sciences, Sirius University of Science and Technology, 1 Olympic Ave., 354340 Sochi, Russian Federation

<sup>d.</sup> College of Textile Science and Engineering (International Institute of Silk), Zhejiang Sci-Tech University, Hangzhou 310018, China

<sup>§</sup> Present address: Madrid Institute for Advanced Studies in Nanoscience (IMDEA Nanoscience), Ciudad Universitaria de Cantoblanco, C/Faraday 9, Madrid 28049 (Spain).

<sup>l</sup> Present address: Department of Chemistry, KU Leuven, Celestijnenlaan 200F, Box 2404, B-3001 Leuven (Belgium).

- I. The surface morphology of PTFE-rubbed substrates was investigated with Atomic Force microscopy using a Multimode instrument coupled to a NanoScope IV controller from (Bruker). To this end, a layer of a model main-chain liquid crystal, poly(dipropyl siloxane) (PDPS), was deposited by spin-coating on a PTFE-rubbed Si substrate.[1] Figure S1 shows the characteristic AFM height image where the direction of the aligned PDPS lamellae revealing the orientation of the underlying PTFE layer.[1]

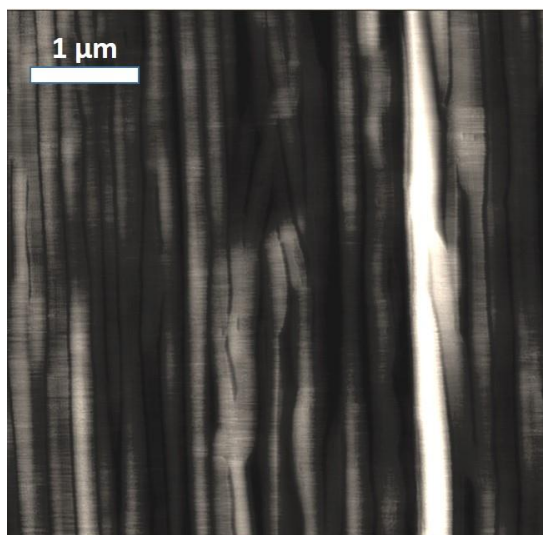

**Figure S1.** Height AFM image of poly(dipropyl siloxane) deposited on a PTFE-rubbed Si substrate. The orientation of PDPS lamellae reveal the quality of alignment of the underlying PTFE-rubbed Si substrate.

- II. The effect of thermal treatment on A-Na thin films prepared with different thickness was evaluated as follows. To perform thermal annealing process, the samples were kept at 75°C for 30 minutes, well above the isotropization temperature of the mesophase. The liquid crystalline phase was formed upon cooling of the samples to 30°C. No changes in liquid crystalline phase or sample morphology and orientation compared to the fresh samples shown in the main text are detected after the annealing, as can be observed in figure S2.

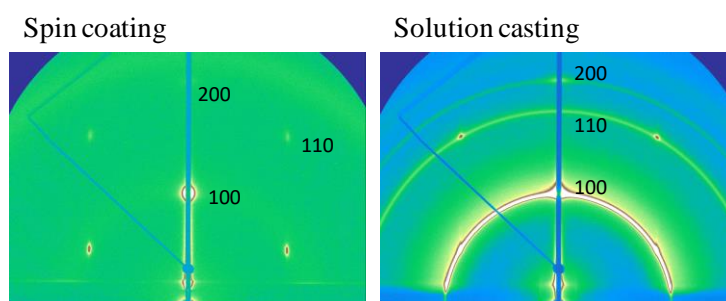

**Figure S2.** 2D GISAXS patterns measured on A-Na films with different thicknesses (several tens of nm - left and several hundreds of nm - right) prepared over Si substrates.

III. The Herman's function ( $f_2$ ) was employed for evaluation of the orientation of the supramolecular columnar structure formed by the **A-Na** sulphonate. The function is defined as:

$$f_2 = \frac{3\langle \cos^2 \varphi \rangle - 1}{2} \quad \text{Eq. (1)}$$

where

$$\langle \cos^2 \varphi \rangle = \frac{\int_0^\pi I_i \sin \varphi_i \cos^2 \varphi_i d\varphi}{\int_0^\pi I_i \sin \varphi_i d\varphi} \quad \text{Eq. (2)}$$

In Eqs. (1-2),  $\varphi$  corresponds to the angle between columnar axis of the mesophase and the axis of the pore. To evaluate  $\varphi$  from the azimuthal position of 100 reflection of the hexagonal phase the  $\langle \cos^2 \varphi_{100} \rangle$  has to be calculated.

In the next step, the relationship between  $\langle \cos^2 \varphi \rangle$  and  $\langle \cos^2 \varphi_{100} \rangle$  can be written as [2]:

$$\langle \cos^2 \varphi \rangle = 1 - 2\langle \cos^2 \varphi_{100} \rangle \quad \text{Eq. (3)}$$

The angular references and  $s$ -range used to obtain the azimuthal intensity profiles for the calculation of the orientation function are depicted schematically in figure S3a. Prior to the calculation of  $f_2$ , the background corrected scattering curves were normalized. The intensity profiles obtained at different distances from the AAO template/A-Na film interface are shown in figure S3b.

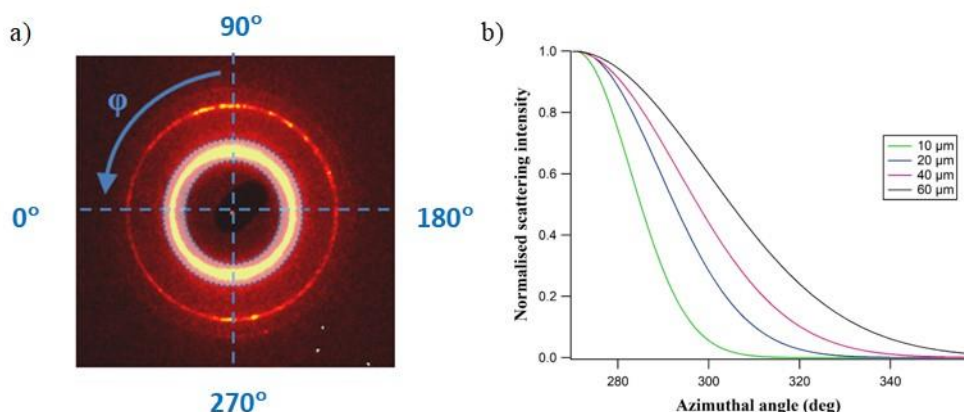

**Figure S3.** (a) Scheme of reference angles and region corresponding to the 100 reflection of the Col<sub>hd</sub> phase (shadowed using white ring) used for the calculation of the Herman's orientation function. (b) Azimuthal intensity profiles obtained at different distances from the AAO template/A-Na film interface after background subtraction and normalization procedure.

## References

- 1 Y. Odarchenko, M. Defaux, M. Rosenthal, A. Akhkiamova, P. Bovsunovskaya, A. Melnikov, A. Rodygin, A. Rychkov, K. Gerasimov, D.V. Anokhin, X. Zhu, D.A. Ivanov, One Methylene Group in the Side Chain Can Alter by 90 Degrees the Orientation of a Main-Chain Liquid Crystal on a Unidirectional Substrate, *ACS Macro Lett.* 2018, **7**, 453–458.

- 2 Z.W. Wilchinsky, Determination of Orientation of the Crystalline and Amorphous Phases in Polyethylene by X-Ray Diffraction, *Journal of Polymer Science: Part A-2* 1968, **6**, 281-288.
